# Dose-dependent Association between Intermediate-acting Neuromuscular-blocking Agents and Postoperative Respiratory Complications

Duncan J. McLean, M.B.Ch.B., Daniel Diaz-Gil, Cand.Med., Hassan N. Farhan, M.B.B.S., Karim S. Ladha, M.D., Tobias Kurth, M.D., Sc.D., Matthias Eikermann, M.D., Ph.D.

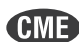

This article has been selected for the ANESTHESIOLOGY CME Program. Learning objectives and disclosure and ordering information can be found in the CME section at the front of this issue.

## ABSTRACT

**Background:** Duration of action increases with repeated administration of neuromuscular-blocking agents, and intraoperative use of high doses of neuromuscular-blocking agent may affect respiratory safety.

**Methods:** In a hospital-based registry study on 48,499 patients who received intermediate-acting neuromuscular-blocking agents, the authors tested the primary hypothesis that neuromuscular-blocking agents are dose dependently associated with the risk of postoperative respiratory complications. In the secondary analysis, the authors evaluated the association between neostigmine dose given for reversal of neuromuscular-blocking agents and respiratory complications. *Post hoc*, the authors evaluated the effects of appropriate neostigmine reversal (neostigmine  $\leq 60$   $\mu\text{g/kg}$  after recovery of train-of-four count of 2) on respiratory complications. The authors controlled for patient-, anesthesia-, and surgical complexity-related risk factors.

**Results:** High doses of neuromuscular-blocking agents were associated with an increased risk of postoperative respiratory complications ( $n = 644$ ) compared with low doses ( $n = 205$ ) (odds ratio [OR], 1.28; 95% CI, 1.04 to 1.57). Neostigmine was associated with a dose-dependent increase in the risk of postoperative respiratory complications (OR, 1.51; 95% CI, 1.25 to 1.83). *Post hoc* analysis revealed that appropriate neostigmine reversal eliminated the dose-dependent association between neuromuscular-blocking agents and respiratory complications (for neuromuscular-blocking agent effects with appropriate reversal: OR, 0.98; 95% CI, 0.63 to 1.52).

**Conclusions:** The use of neuromuscular-blocking agents was dose dependently associated with increased risk of postoperative respiratory complications. Neostigmine reversal was also associated with a dose-dependent increase in the risk of respiratory complications. However, the exploratory data analysis suggests that the proper use of neostigmine guided by neuromuscular transmission monitoring results can help eliminate postoperative respiratory complications associated with the use of neuromuscular-blocking agents. (ANESTHESIOLOGY 2015; 122:1201-13)

THE World Health Organization estimates that at least 187 million surgeries requiring general anesthesia are performed each year worldwide.<sup>1</sup> Anesthesiologists often use intermediate-acting neuromuscular-blocking agents (NMBAs) to facilitate tracheal intubation and maintain optimal surgical conditions.<sup>2</sup> However, studies show that NMBAs are associated with postoperative respiratory complications including postextubation hypoxia, respiratory failure, negative pressure-induced pulmonary edema, and atelectasis.<sup>3-5</sup>

Postoperative respiratory complications are the second most common postoperative surgical complications, after wound infection,<sup>6,7</sup> and contribute to a significant financial

### What We Already Know about This Topic

- Use of high doses of intermediate-acting neuromuscular blockers may result in residual weakness and compromise patient safety

### What This Article Tells Us That Is New

- In an analysis of nearly 50,000 subjects, use of intermediate-acting neuromuscular blockers was associated with a dose-dependent increase in pulmonary complications
- Neostigmine also was associated with a dose-dependent increase in pulmonary complications although exploratory analysis suggested that this reflected lack of neostigmine dose adjustment using neuromuscular transmission monitoring

This article is featured in "This Month in Anesthesiology," page 1A. Corresponding article on page 1183. This study was selected for presentation at the 2014 American Society of Anesthesiologists ANESTHESIOLOGY Journal Symposium, New Orleans, Louisiana, October 11–15, 2014. The first two authors made equal contributions to this article. The last two authors made equal contributions to this article.

Submitted for publication June 28, 2014. Accepted for publication January 30, 2015. From the Department of Anesthesia, Critical Care, and Pain Medicine, Massachusetts General Hospital, Boston, Massachusetts (D.J.M., D.D.-G., H.N.F., K.S.L., M.E.); Inserm Research Center for Epidemiology and Biostatistics (U897)—Team Neuroepidemiology, Bordeaux, France (T.K.); University of Bordeaux, College of Health Sciences, Bordeaux, France (T.K.); Division of Preventive Medicine, Brigham and Women's Hospital, Boston, Massachusetts (T.K.); and Universitätsklinikum Duisburg-Essen, Essen, Germany (M.E.).

Copyright © 2015, the American Society of Anesthesiologists, Inc. Wolters Kluwer Health, Inc. All Rights Reserved. Anesthesiology 2015; 122:1201-13

burden on hospitals and patients. The average surgical cost is \$5,015 for patients without respiratory complications, increasing 12-fold to \$62,704 for patients who experience respiratory complications.<sup>6-9</sup>

Anesthesiologists need to balance optimal surgical conditions and associated side effects of medications used to accomplish surgical relaxation. Although deeper levels of neuromuscular blockade may improve surgical conditions, larger doses of NMBAs are more difficult to reverse and put patients at a greater risk of developing residual paralysis.<sup>10</sup>

Repeated administration of NMBAs leads to a prolonged duration of action, as defined by the time between administration of NMBA and recovery to a train-of-four (TOF) ratio greater than or equal to 0.9.<sup>10-12</sup> We, therefore, hypothesized that NMBAs are dose dependently associated with increased risk of postoperative respiratory complications. Our secondary hypothesis was that the acetylcholinesterase inhibitor neostigmine, which is used to reverse the effects of NMBAs at the end of the case, does not ameliorate their harmful effects on postoperative respiratory outcomes.

## Materials and Methods

### Study Design and Setting

After obtaining the approval from the Partners Institutional Review Board (protocol number: 2014P000420), we performed an observational analysis by using data on adult patients who underwent noncardiac surgery at Massachusetts General Hospital between January 2007 and September 2012. Intraoperative data were retrieved from the anesthesia information management system (AIMS). The AIMS includes the following data elements: comorbidities, operative procedure, physiological data, medications, fluid therapy, and adverse events. In addition, we used billing and demographic data from the Research Patient Data Registry (RPDR). The RPDR is a centralized clinical data registry that gathers data from hospital legacy systems for the purpose of research.

By using similar methodology to previous outcomes-based studies from our group, we validated our data by reabstracting clinical information from the anesthesia record and comparing it with the electronic data on a sample of 100 randomly selected patients.<sup>13,14</sup>

### Patient Selection

We included patients aged 18 yr and older who underwent noncardiac surgical procedures, received intermediate-acting NMBAs, and whose tracheas were intubated at the beginning of the case and extubated in the operating room at the end of the case. Cases for which the same patient had additional surgical procedures within the previous 4 weeks were excluded.

### Exposure Variables

We defined the use of intermediate-acting NMBAs as any intraoperative dose of atracurium, cisatracurium, rocuronium,

or vecuronium. We defined the use of neostigmine for reversal as any intraoperative administration of neostigmine. To define the dose of intermediate-acting NMBAs, we created a composite variable that took into account the dose of all the above medications as multiples of their median dose required per body weight to achieve 95% reduction in maximal twitch response from baseline in 50% of the population (ED95),<sup>15-17</sup> corrected for ideal body weight.<sup>18,19</sup> The NMBA dose was specified in our multivariate models as a categorical variable based on its quintile distribution. Neostigmine dose was corrected for ideal body weight.<sup>19</sup>

### Outcome Measures

The primary outcome measure was a composite variable that included the following major postoperative respiratory complications within the first 3 days after extubation: respiratory failure, pulmonary edema, tracheal reintubation, and pneumonia. All study outcomes (respiratory failure, pulmonary edema, tracheal reintubation, and pneumonia) were defined using *International Statistical Classification of Diseases and Related Health Problems, Ninth Revision codes*, and Current Procedural Terminology codes, have been described previously<sup>14</sup> and are listed in appendix 1.

### Covariate Data

By using data from the AIMS and RPDR databases, we defined the preoperative characteristics of our study population: sex, age, body mass index, admission type (in-patient/ambulatory), emergent/nonemergent surgery, and American Society of Anesthesiologists physical status classification. We controlled for patient comorbidities by using the Deyo-Charlson Comorbidity Index<sup>20</sup> and for risk of postoperative respiratory complications by using a previously validated score for preoperative prediction of adverse postoperative respiratory outcomes (SPORC) score.<sup>13</sup> The SPORC score is an 11-point weighted score that allows anesthesiologists to preoperatively define a patient's risk of reintubation.<sup>13</sup> We also controlled for anesthesia duration (time between tracheal intubation and extubation), vasopressor use (calculated as a norepinephrine equivalent dose in microgram per hour),<sup>21</sup> opioid dose (calculated as total morphine equivalent dose in milligram),<sup>22</sup> depth of anesthesia (median dose of inhaled anesthetic agents corrected for age),<sup>23</sup> hypotension (number of minutes spent with a mean arterial pressure <50 mmHg), intraoperative fluid volume (the total volume of colloids and crystalloids administered between intubation and extubation, assuming that colloids have double the effective intravascular filling effect of crystalloids), and blood transfusion (number of units of erythrocytes).

By using a previously validated method, we classified surgical body region into 11 distinct groups according to Current Procedural Terminology code mapping<sup>24</sup> and stratified procedural severity using relative value units.<sup>25</sup> Surgical body regions are listed in table 1, and control variables included in each analysis are listed in appendix 2.

**Table 1.** Characteristics of Study Population

|                                                               | Cases (%) without<br>Pulmonary<br>Complications | Cases (%) with<br>Pulmonary<br>Complications |
|---------------------------------------------------------------|-------------------------------------------------|----------------------------------------------|
| All Cases                                                     |                                                 |                                              |
| 48,499                                                        | 46,687 (96.26)                                  | 1,812 (3.74)                                 |
| Subgroup                                                      | Cases without<br>Pulmonary<br>Complications     | Cases (%) with<br>Pulmonary<br>Complications |
| NMBA dose as multiples of ED95 (quintiles)                    |                                                 |                                              |
| 0.09–2.19                                                     | 9,883                                           | 205 (2.03)                                   |
| 2.20–2.94                                                     | 9,456                                           | 256 (2.64)                                   |
| 2.95–3.80                                                     | 9,329                                           | 310 (3.22)                                   |
| 3.81–5.15                                                     | 9,104                                           | 397 (4.18)                                   |
| >5.15                                                         | 8,915                                           | 644 (6.74)                                   |
| Neostigmine dose ( $\mu\text{g}/\text{kg}$ ideal body weight) |                                                 |                                              |
| 0                                                             | 12,273                                          | 334 (2.65)                                   |
| <20                                                           | 1,369                                           | 38 (2.70)                                    |
| 20–40                                                         | 7,390                                           | 233 (3.06)                                   |
| 41–60                                                         | 11,058                                          | 386 (3.37)                                   |
| 61–80                                                         | 9,216                                           | 482 (4.97)                                   |
| >80                                                           | 5,381                                           | 339 (5.93)                                   |
| Age (yr)                                                      |                                                 |                                              |
| 18–25                                                         | 2,668                                           | 26 (0.97)                                    |
| 26–35                                                         | 4,292                                           | 54 (1.24)                                    |
| 36–45                                                         | 6,847                                           | 118 (1.69)                                   |
| 46–55                                                         | 1,088                                           | 269 (2.60)                                   |
| 56–65                                                         | 10,648                                          | 444 (4.00)                                   |
| 66–75                                                         | 7,568                                           | 503 (6.23)                                   |
| >75                                                           | 4,576                                           | 398 (8.00)                                   |
| Sex                                                           |                                                 |                                              |
| Male                                                          | 20,697                                          | 912 (4.22)                                   |
| Female                                                        | 25,990                                          | 900 (3.35)                                   |
| Body mass index                                               |                                                 |                                              |
| <18 (underweight)                                             | 571                                             | 39 (6.39)                                    |
| 18–24.9 (normal weight)                                       | 14,939                                          | 560 (3.61)                                   |
| 25–29.9 (overweight)                                          | 15,520                                          | 556 (3.46)                                   |
| 30–34.9 (obese)                                               | 8,679                                           | 355 (3.93)                                   |
| 35+ (morbidly obese)                                          | 6,978                                           | 302 (4.15)                                   |
| Procedure duration (h)                                        |                                                 |                                              |
| <1:00                                                         | 2,439                                           | 41 (1.65)                                    |
| 1:00–2:00                                                     | 12,877                                          | 324 (2.45)                                   |
| 2:01–4:00                                                     | 20,916                                          | 721 (3.33)                                   |
| 4:01–8:00                                                     | 9,490                                           | 626 (6.19)                                   |
| >8:00                                                         | 965                                             | 100 (9.39)                                   |
| ASA classification                                            |                                                 |                                              |
| 1                                                             | 5,033                                           | 23 (0.45)                                    |
| 2                                                             | 29,021                                          | 607 (2.05)                                   |
| 3                                                             | 12,113                                          | 1,075 (8.15)                                 |
| 4                                                             | 512                                             | 107 (17.29)                                  |
| 5                                                             | 8                                               | 0 (0.00)                                     |
| Charlson Comorbidity Index                                    |                                                 |                                              |
| 0                                                             | 24,133                                          | 139 (0.57)                                   |
| 1–2                                                           | 12,398                                          | 537 (4.15)                                   |
| 3–4                                                           | 4,213                                           | 406 (8.79)                                   |
| 5–6                                                           | 1,200                                           | 186 (13.42)                                  |
| >6                                                            | 4,743                                           | 544 (10.29)                                  |

(Continued)

**Table 1.** (Continued)

|                                                                                        | Cases (%) without<br>Pulmonary<br>Complications | Cases (%) with<br>Pulmonary<br>Complications |
|----------------------------------------------------------------------------------------|-------------------------------------------------|----------------------------------------------|
| All Cases                                                                              |                                                 |                                              |
| 48,499                                                                                 | 46,687 (96.26)                                  | 1,812 (3.74)                                 |
| Subgroup                                                                               | Cases without<br>Pulmonary<br>Complications     | Cases (%) with<br>Pulmonary<br>Complications |
| SPORC score                                                                            |                                                 |                                              |
| 0                                                                                      | 24,301                                          | 231 (0.94)                                   |
| 1–3                                                                                    | 15,341                                          | 589 (3.70)                                   |
| 4–6                                                                                    | 5,962                                           | 720 (10.78)                                  |
| >6                                                                                     | 1,083                                           | 272 (20.07)                                  |
| Depth of anesthesia (median age-corrected minimum alveolar concentration in quintiles) |                                                 |                                              |
| <0.75                                                                                  | 7,762                                           | 473 (5.74)                                   |
| 0.75–0.88                                                                              | 9,545                                           | 475 (4.74)                                   |
| 0.89–1.00                                                                              | 9,987                                           | 372 (3.59)                                   |
| 1.00–1.12                                                                              | 9,866                                           | 268 (2.64)                                   |
| >1.12                                                                                  | 9,527                                           | 224 (2.30)                                   |
| Norepinephrine equivalent dose ( $\mu\text{g kg}^{-1} \text{ h}^{-1}$ quintiles)       |                                                 |                                              |
| 0                                                                                      | 20,129                                          | 701 (3.37)                                   |
| 0.15–15.49                                                                             | 5,744                                           | 308 (5.09)                                   |
| 15.50–27.60                                                                            | 5,761                                           | 261 (4.33)                                   |
| 27.61–44.84                                                                            | 5,673                                           | 222 (3.77)                                   |
| 44.85–77.5                                                                             | 5,327                                           | 192 (3.48)                                   |
| >77.5                                                                                  | 4,053                                           | 128 (3.06)                                   |
| Surgical body region                                                                   |                                                 |                                              |
| Central nervous system                                                                 | 3,411                                           | 120 (3.40)                                   |
| Endocrine                                                                              | 2,408                                           | 28 (1.15)                                    |
| Hemic/lymphatic                                                                        | 538                                             | 11 (2.00)                                    |
| Hernia                                                                                 | 1,359                                           | 22 (1.59)                                    |
| Integumentary                                                                          | 4,041                                           | 49 (1.20)                                    |
| Musculoskeletal                                                                        | 11,543                                          | 252 (2.14)                                   |
| Oropharyngeal/esophagus                                                                | 918                                             | 140 (13.23)                                  |
| Abdomen (no hernias)                                                                   | 9,133                                           | 397 (4.17)                                   |
| Thoracic                                                                               | 1,775                                           | 447 (20.12)                                  |
| Urology/gynecology                                                                     | 9,412                                           | 149 (1.56)                                   |
| Vascular                                                                               | 2,149                                           | 197 (8.40)                                   |
| Admission type                                                                         |                                                 |                                              |
| In-patient                                                                             | 39,510                                          | 1,767 (4.28)                                 |
| Ambulatory                                                                             | 7,177                                           | 45 (0.62)                                    |
| Emergency surgery status                                                               |                                                 |                                              |
| Emergent                                                                               | 1,890                                           | 140 (6.90)                                   |
| Nonemergent                                                                            | 44,797                                          | 1,672 (3.60)                                 |
| Units of blood transfused intraoperatively                                             |                                                 |                                              |
| 0                                                                                      | 44,789                                          | 1,561 (3.37)                                 |
| 1–2                                                                                    | 1,528                                           | 189 (11.01)                                  |
| 3–4                                                                                    | 300                                             | 46 (13.29)                                   |
| 5–6                                                                                    | 49                                              | 11 (18.33)                                   |
| >6                                                                                     | 21                                              | 5 (19.23)                                    |
| Total fluid resuscitation volume (ml in quintiles)                                     |                                                 |                                              |
| <1,000                                                                                 | 15,133                                          | 440 (2.83)                                   |
| 1,000–1,300                                                                            | 3,286                                           | 108 (3.18)                                   |
| 1,301–2,000                                                                            | 12,344                                          | 410 (3.21)                                   |
| 2,001–3,000                                                                            | 7,687                                           | 273 (3.43)                                   |
| >3,000                                                                                 | 8,237                                           | 581 (6.59)                                   |

(Continued)

Table 1. (Continued)

|                                                  | Cases (%) without Pulmonary Complications                          | Cases (%) with Pulmonary Complications                          |
|--------------------------------------------------|--------------------------------------------------------------------|-----------------------------------------------------------------|
| All Cases                                        |                                                                    |                                                                 |
| 48,499                                           | 46,687 (96.26)                                                     | 1,812 (3.74)                                                    |
| Subgroup                                         | Cases without Pulmonary Complications                              | Cases (%) with Pulmonary Complications                          |
| Total morphine equivalent dose (mg in quintiles) |                                                                    |                                                                 |
| 0                                                | 10,416                                                             | 734 (6.58)                                                      |
| <3.25                                            | 4,281                                                              | 150 (3.39)                                                      |
| 3.25–6.50                                        | 7,750                                                              | 206 (2.59)                                                      |
| 6.51–9.25                                        | 8,837                                                              | 223 (2.46)                                                      |
| 9.26–13.25                                       | 4,915                                                              | 156 (3.08)                                                      |
| >13.25                                           | 10,488                                                             | 343 (3.17)                                                      |
| Number of hypotensive minutes                    |                                                                    |                                                                 |
| 0                                                | 35,991                                                             | 1,065 (2.87)                                                    |
| 1–5                                              | 6,659                                                              | 538 (7.48)                                                      |
| 6–10                                             | 2,507                                                              | 111 (4.24)                                                      |
| 11–15                                            | 688                                                                | 43 (5.88)                                                       |
| 16–20                                            | 229                                                                | 15 (6.15)                                                       |
| 21–25                                            | 194                                                                | 14 (6.73)                                                       |
| 26–30                                            | 125                                                                | 7 (5.30)                                                        |
| >30                                              | 294                                                                | 19 (6.07)                                                       |
| Use of train-of-four monitoring                  |                                                                    |                                                                 |
| Yes                                              | 33,216                                                             | 1,292 (3.74)                                                    |
| No                                               | 13,471                                                             | 520 (3.72)                                                      |
| Subgroup                                         | Median (Interquartile Range) Cases without Pulmonary Complications | Median (Interquartile Range) Cases with Pulmonary Complications |
| Surgical procedure relative value units          | 17.28 (11.35–23.53)                                                | 23.53 (17.31–29.40)                                             |
| Time (min) between last NMBA dose and extubation | 85 (58–131)                                                        | 81 (59–125)                                                     |

Characterization of the study cohort as defined by all covariates. Values given as frequencies (%) unless stated otherwise.

ASA = American Society of Anesthesiologists; ED95 = median dose required per body weight to achieve 95% reduction in maximal twitch response from baseline in 50% of the population; NMBA = neuromuscular-blocking agent; SPORC score = score for preoperative prediction of adverse postoperative respiratory outcomes.

### Statistical Analysis

A hypothesis-driven approach was used to build our regression models, and we included all potential confounders based on *a priori* clinical and pathophysiological knowledge. We performed logistic regression analysis with the use of SPSS version 22 (IBM, USA), STATA version 13 (Stata-Corp, USA), and SAS version 9.2 (SAS Institute, USA). Results are presented as odds ratios (ORs) with 95% CIs. We considered a two-tailed *P* value of less than 0.05 to be statistically significant.

For our primary analysis, we performed logistic regression analysis to examine the association between dose of intermediate-acting NMBAs and risk of adverse respiratory events (respiratory failure, pulmonary edema, tracheal

reintubation, and pneumonia) within the first 3 days after surgery. We calculated a *P* value for trend across intermediate-acting NMBA dosages by using the Wald test. As listed in appendix 2, we included neostigmine dose, age, sex, body mass index, American Society of Anesthesiologists classification, procedure duration, all Charlson Comorbidity Index variables, all SPORC score variables, depth of anesthesia (age-corrected minimum alveolar concentration), norepinephrine equivalent dose per hour, surgical body region, surgical procedure relative value units, admission type (inpatient/ambulatory), emergency surgery status, transfused blood units, total fluid resuscitation volume, morphine equivalent dose, number of hypotensive minutes, and use of TOF monitoring for confounder control in our model. Our dose calculations were based on ideal body weight due to the hydrophilic nature of NMBAs. For clinical applicability, we performed further analysis with categorized NMBA dosages in quintiles by using the same model, enabling us to illustrate the doses that were associated with a high OR for respiratory complications.

To address potential unidentified confounding effects of surgery type, we repeated our primary analysis on a subset of subjects who had laparoscopic cholecystectomies. We chose this common upper abdominal surgical procedure because the incidence of respiratory complications is relatively high.<sup>26</sup> In this logistic regression, we only included neostigmine dose, age, sex, body mass index, American Society of Anesthesiologists classification, and morphine equivalent dose for confounder control to avoid a type II error caused by a lower sample size. To account for the potential confounding effect of multiple surgeries, we repeated our primary analysis after excluding all cases with any repeat surgery within the 5-yr time window that our data was collected by using a logistic regression with the same confounder control model as for the full dataset.

For our secondary analysis, we performed logistic regression analysis to examine the dose-dependent association between the use of neostigmine and risk of postoperative respiratory complications within the first 3 days after surgery. We then examined the risk of postoperative respiratory complications as a function of the dose of reversal agent. For both regressions, we used the same confounder control as for the primary model, including NMBA dose. We calculated a *P* value for trend across neostigmine dose categories by using the Wald test and categorized neostigmine dosages for further analysis and clinical applicability.

All other comparisons were made with an exploratory intention. To identify whether the risk of postoperative respiratory complications is affected by administration according to TOF monitoring, we repeated our primary analysis in a subset of patients who received neostigmine after a minimum TOF count of 2. To identify whether a combination of optimized neostigmine dose, and use of twitch monitoring can eliminate the dose-dependent effects of NMBAs on respiratory complications, we repeated our primary and secondary analyses in a subset of



cases where neostigmine was given after a TOF count of 2 or greater and at doses 60 µg/kg or less. The definition of optimized neostigmine dose was based on the results of a recently published study<sup>27</sup> and our exploratory analysis. We additionally categorized our full patient population to reflect appropriate reversal (neostigmine ≤60 µg/kg given at a TOF count of ≥2), inappropriate reversal (neostigmine >60 µg/kg or neostigmine ≤60 µg/kg given without TOF monitoring indicating recovery of TOF count to 2 before neostigmine administration), and no reversal and ran a logistic regression with the same confounder control as for our primary and secondary analyses.

## Results

Table 1 shows the characteristics of our study cohort. Between January 2007 and September 2012, a total of 72,158 surgical cases met the inclusion criteria of this study, and after excluding cases with missing data ( $n = 23,659$ ), 48,499 cases were included in the analysis. The stepwise exclusion from collected data to our final dataset for analysis is demonstrated in figure 1. Of the intermediate-acting NMBA administered, 46.0% were benzylisoquinoline NMBA and

54.0% were aminosteroidal NMBA. Neostigmine was administered in 74.0% of the cases, and subjective assessment of evoked TOF count in response to TOF stimulation was used in 71.2% of cases. Of the 48,499 cases included in the analysis, 1,812 cases (3.7%) experienced postoperative respiratory complications, 1,211 (2.5%) experienced pulmonary edema, 627 (1.3%) experienced respiratory failure, 333 (0.7%) experienced pneumonia, and 123 (0.3%) were reintubated within the first 3 postoperative days. A total of 392 patients (0.8%) had more than one respiratory complication.

### Primary Analysis

Logistic regression analysis revealed a higher risk of postoperative respiratory complications with administration of higher doses of intermediate-acting nondepolarizing NMBA (composite respiratory outcome, highest quintile *vs.* lowest quintile: OR, 1.28; 95% CI, 1.04 to 1.57;  $P = 0.02$ ; fig. 2). Dose-response function across NMBA doses revealed a  $P$  value for trend of 0.005 (relative risk increase per ED95 increase: OR, 1.024; 95% CI, 1.007 to 1.041). ORs for individual respiratory outcomes are shown in table 2. All

| Criteria                                        | Number excluded | Number remaining |
|-------------------------------------------------|-----------------|------------------|
| Total dataset                                   | -               | 103,282          |
| Unavailable RPDR subject data                   | 82              | 103,200          |
| Known test cases removed                        | 17              | 103,183          |
| Multiple surgeries in 4 weeks                   | 5,748           | 97,435           |
| Subjects <18 years old                          | 6,443           | 90,992           |
| Cardiac Surgery                                 | 709             | 90,283           |
| ASA 6 cases                                     | 15              | 90,268           |
| Cases with no record of intraoperative NMBA use | 18,110          | 72,158           |
| Missing Data                                    | 23,659          | 48,499           |
| Final dataset                                   | -               | 48,499           |

**Fig. 1.** Stepwise exclusion of data from initial dataset to dataset used for all analyses. ASA = American Society of Anesthesiologists; NMBA = neuromuscular-blocking agent; RPDR = Research Patient Data Registry.

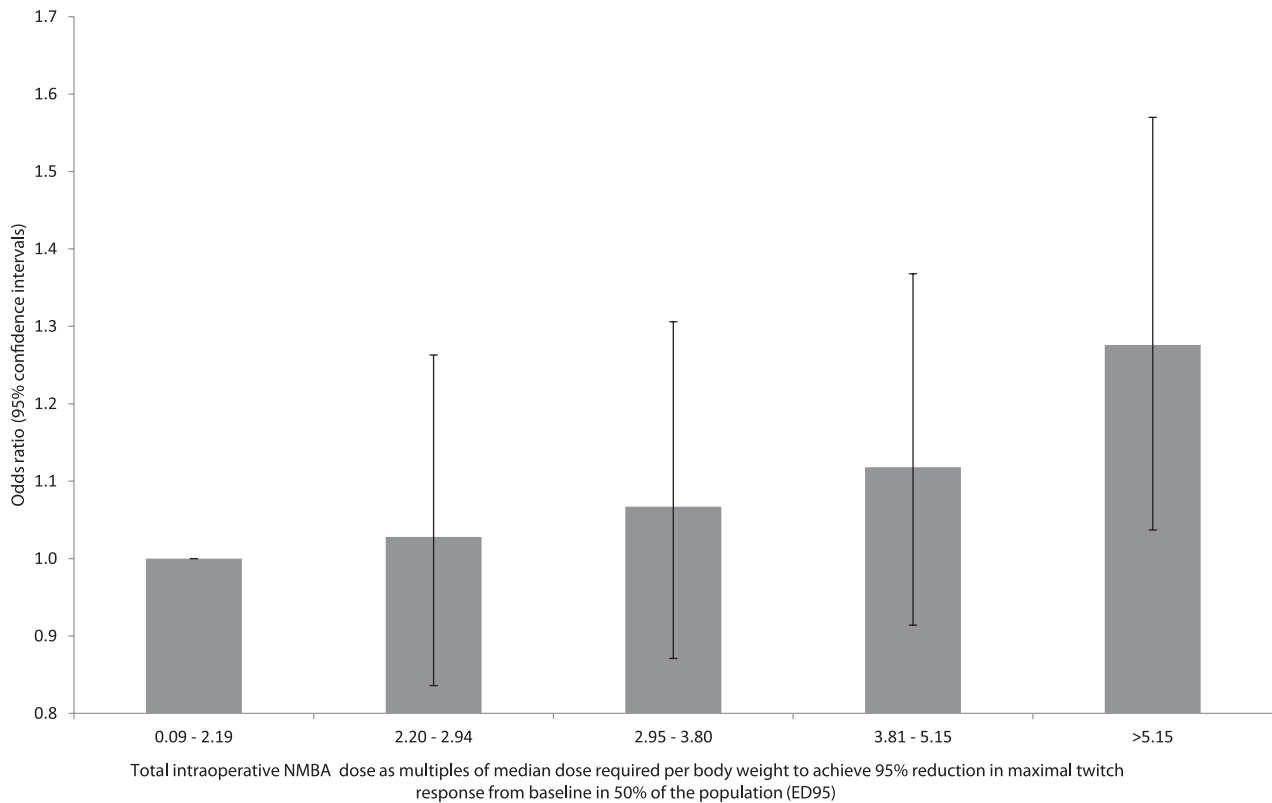

**Fig. 2.** Association between neuromuscular-blocking agent (NMBA) dose and postoperative respiratory complications. NMBA dose shown as multiples of the median dose required per body weight to achieve 95% reduction in maximal twitch response from baseline in 50% of the population (ED95) categorized by quintile. Effect size displayed as odds ratio with 95% CIs.

variables used in the primary analysis were forced into the regression model and were categorized as shown in table 1.

To control for the potential confounding effect of surgery type, we ran a sensitivity analysis on patients who had a laparoscopic cholecystectomy ( $n = 1,806$ ). Within this set of cases, the positive association between high-dose intermediate-acting NMBAs and postoperative respiratory complications within 3 days after surgery was significant (highest quintile *vs.* lowest

quintile OR, 3.42; 95% CI, 1.01 to 11.57;  $P = 0.048$ ). In our total dataset, 5,748 patients had multiple surgeries within 4 weeks. We removed these cases from the analysis database to minimize the confounding effects. To eliminate the additional confounding effect of multiple surgeries within 5 yr, we performed an additional sensitivity analysis after excluding these cases ( $n = 9,080$ ). However, NMBA dose was still associated with postoperative respiratory complications (composite

**Table 2.** Primary Analysis: Association between Use of Intermediate-acting NMBAs and Postoperative Respiratory Complications

| NMBA Dose Quintiles as Multiple of ED95    | 0.09–2.19<br>(n = 10,088) | 2.20–2.94<br>(n = 9,712) | 2.95–3.80<br>(n = 9,639) | 3.81–5.15<br>(n = 9,501) | >5.15<br>(n = 9,559) | Odds Ratio<br>Highest vs. Lowest<br>Quintiles (95% CIs) |
|--------------------------------------------|---------------------------|--------------------------|--------------------------|--------------------------|----------------------|---------------------------------------------------------|
| Postoperative respiratory complications    | 205 (2.0%)                | 256 (2.6%)               | 310 (3.2%)               | 397 (4.2%)               | 644 (6.7%)           | 1.28 (1.04–1.57)<br>$P$ for trend = 0.005               |
| Breakdown of composite respiratory outcome |                           |                          |                          |                          |                      |                                                         |
| Pulmonary edema                            | 141 (1.4%)                | 180 (1.9%)               | 206 (2.1%)               | 252 (2.7%)               | 432 (4.5%)           | 1.20 (0.93–1.54)                                        |
| Respiratory failure                        | 49 (0.5%)                 | 74 (0.8%)                | 92 (1.0%)                | 135 (1.4%)               | 277 (2.9%)           | 1.52 (1.06–2.19)                                        |
| Pneumonia                                  | 44 (0.4%)                 | 54 (0.6%)                | 67 (0.7%)                | 81 (0.9%)                | 87 (0.9%)            | 1.28 (0.82–2.01)                                        |
| Reintubation                               | 11 (0.1%)                 | 18 (0.2%)                | 12 (0.1%)                | 34 (0.4%)                | 48 (0.5%)            | 1.29 (0.60–2.75)                                        |

Incidences are displayed as frequency (%), and estimated effects are displayed as odds ratios with 95% CIs. For NMBA dose, the value displayed is for the comparison of high dose (fifth quintile) with low dose (first quintile). The following covariates were included in the model: neostigmine dose, age, sex, body mass index, American Society of Anesthesiologists classification, procedure duration, Charlson Comorbidity Index variables, score for prediction of respiratory complications variables, depth of anesthesia (age-corrected minimum alveolar concentration), norepinephrine equivalent dose per hour, surgical body region, surgical procedure relative value units, admission type (in-patient/ambulatory), emergency surgery status, transfused blood units, total fluid resuscitation volume, morphine equivalent dose, number of hypotensive minutes during the case, and documentation of any train-of-four monitoring. ED95 = median dose required per body weight to achieve 95% reduction in maximal twitch response from baseline in 50% of the population; NMBA = neuromuscular-blocking agent.

respiratory outcome, highest quintile *vs.* lowest quintile OR, 1.38; 95% CI, 1.09 to 1.76;  $P = 0.008$ ).

There was no significant difference in association of benzyloisoquinolines on respiratory complications in comparison with aminosteroidal NMBAs (composite respiratory outcome: OR, 1.12; 95% CI, 0.99 to 1.26;  $P = 0.08$ ).

### Secondary Analysis

Administration of neostigmine was associated with an increased risk of postoperative respiratory complications (composite respiratory outcome, neostigmine *vs.* no neostigmine: OR, 1.19; 95% CI, 1.03 to 1.37;  $P = 0.017$ ) in a dose-dependent manner ( $P$  for trend  $<0.001$ ). Doses of neostigmine greater than 60  $\mu\text{g/kg}$  were associated with an increased risk of postoperative respiratory complications (composite respiratory outcome: 61 to 80  $\mu\text{g/kg}$  and  $>80 \mu\text{g/kg}$  *vs.*  $<20 \mu\text{g/kg}$  neostigmine; OR, 1.20; 95% CI, 1.01 to 1.43;  $P = 0.034$ ; and OR, 1.51; 95% CI, 1.25 to 1.83;  $P <0.001$ , respectively). Individual results are presented in table 3. When including an interaction term between NMBA dose and neostigmine dose, logistic regression analysis demonstrated a positive interaction effect (OR, 1.70; 95% CI, 1.27 to 2.26;  $P <0.001$ ), indicating that the association between neostigmine dose and postoperative respiratory complications is stronger in cases where higher doses of NMBAs are administered.

### Exploratory Analysis

Appropriate neostigmine reversal has been previously defined as administration after recovery to a TOF count of 2 or

greater.<sup>27,28</sup> Based on the results from our secondary analysis, we refined this definition as neostigmine administration at doses 60  $\mu\text{g/kg}$  or less after TOF count of 2 or greater. Appropriate use of neostigmine for NMBA reversal was associated with a decrease in risk for postoperative pulmonary complications (appropriate neostigmine use *vs.* inappropriate neostigmine use: OR, 0.79; 95% CI, 0.69 to 0.92;  $P = 0.002$ ). In the cases with appropriate neostigmine reversal, total NMBA dose given during surgery no longer predicted the risk of postoperative respiratory complications (composite respiratory outcome, highest *vs.* lowest quintile of NMBA dose: OR, 0.98; 95% CIs, 0.63 to 1.52;  $P = 0.94$ ). In cases where the criterion of appropriate neostigmine administration was not met, high NMBA dose remained associated with a dose-dependent increasing risk of postoperative respiratory complications (composite respiratory outcome, highest *vs.* lowest quintile of NMBA dose: OR, 1.41; 95% CI, 1.11 to 1.79;  $P = 0.005$ ; table 4). Of note, in all cases where neostigmine was administered at a TOF count of 2 or greater (not taking into account neostigmine dose), high NMBA dose remained associated with a dose-dependent increasing risk of postoperative respiratory complications (composite respiratory outcome, highest *vs.* lowest quintile of NMBA dose: OR, 1.70; 95% CI, 1.26 to 2.28;  $P <0.001$ ).

### Discussion

In this large, single-center study, we show a dose-dependent association between intermediate-acting NMBAs and postoperative respiratory complications. This increased risk in respiratory complications occurs irrespective of the class of NMBA used (benzyloisoquinolines or aminosteroidal NMBAs). Neostigmine was associated with a dose-dependent increase in the risk of postoperative respiratory complications. Appropriate neostigmine reversal (doses of  $\leq 60 \mu\text{g/kg}$  given after recovery of the second TOF twitch) may be sufficient to eliminate the dose-dependent increasing risk of postoperative respiratory outcome, due to NMBAs.

### Association between NMBAs and Postoperative Respiratory Complications

Intermediate-acting NMBAs have long been considered to have a safer side effect profile compared with the long-acting NMBA, pancuronium.<sup>29</sup> Despite the transition in clinical practice during the past few decades to the use of intermediate-acting NMBAs, studies continue to show that these drugs are associated with postoperative residual paralysis and associated signs and symptoms of postoperative respiratory failure.<sup>10,14,30–37</sup> The potential causes of postoperative respiratory complications are complex and multifactorial.<sup>13</sup> Underlying comorbidities, intraoperative mechanical ventilation,<sup>38</sup> surgical trauma,<sup>39</sup> fluid resuscitation,<sup>40</sup> and drugs used in anesthesia,<sup>14</sup> all contribute to the risk of respiratory complications.<sup>13</sup> Our data show that high total NMBA doses increase the incidence of postoperative respiratory complications (OR, 1.28; 95% CI, 1.04 to 1.57;  $P = 0.02$ ), probably as a result of residual blockade.<sup>41–46</sup>

**Table 3.** Secondary Analysis: Association between Use of Neostigmine and Postoperative Respiratory Complications

|                                          | Patients, No. (%) | Patients with Respiratory Complications, No. (%) | Comparison with No Neostigmine Administration |
|------------------------------------------|-------------------|--------------------------------------------------|-----------------------------------------------|
| Patients who received neostigmine        | 35,897 (74.0%)    | 1,478 (4.1%)                                     | 1.19 (1.03–1.37)                              |
| Patients who did not receive neostigmine | 12,602 (26.0%)    | 334 (2.7%)                                       | Not applicable                                |
| Dose–response, mg/kg                     |                   |                                                  |                                               |
| <0.02                                    | 1,407 (3.9%)      | 38 (2.7%)                                        | 0.97 (0.67–1.40)                              |
| 0.02–0.04                                | 7,623 (21.2%)     | 233 (3.1%)                                       | 1.05 (0.87–1.27)                              |
| 0.041–0.06                               | 11,455 (31.9%)    | 386 (3.4%)                                       | 1.09 (0.92–1.30)                              |
| 0.061–0.08                               | 9,698 (27.0%)     | 482 (5.0%)                                       | 1.20 (1.01–1.42)                              |
| >0.08                                    | 5,720 (15.9%)     | 339 (5.9%)                                       | 1.51 (1.25–1.83)                              |

Numbers of patients in each category are displayed as frequency (%). Incidences are displayed as frequency (%), and estimated effects are displayed as odds ratios with 95% CIs. The following covariates were included in the model: neuromuscular-blocking agent dose, age, sex, body mass index, American Society of Anesthesiologists classification, procedure duration, Charlson Comorbidity Index variables, score for prediction of respiratory complications variables, depth of anesthesia (age-corrected minimum alveolar concentration), norepinephrine equivalent dose per hour, surgical body region, surgical procedure relative value units, admission type (in-patient/ambulatory), emergency surgery status, transfused blood units, total fluid resuscitation volume, morphine equivalent dose, number of hypotensive minutes during the case, and documentation of any train-of-four monitoring.

**Table 4.** Exploratory Analysis: Association between NMBA Dose and Risk of Postoperative Respiratory Complications

| NMBA Dose<br>(Multiples ED95) | Appropriate Reversal (n = 13,799)                 |                  | Inappropriate Reversal (n = 34,700)               |                  |
|-------------------------------|---------------------------------------------------|------------------|---------------------------------------------------|------------------|
|                               | Postoperative Respiratory<br>Complications, n (%) | Effect Size      | Postoperative Respiratory<br>Complications, n (%) | Effect Size      |
| 0.09–2.19                     | 55 (0.39%)                                        | n/a              | 150 (0.43%)                                       | Not applicable   |
| 2.20–2.94                     | 62 (0.45%)                                        | 1.04 (0.69–1.56) | 194 (0.56%)                                       | 1.03 (0.81–1.31) |
| 2.95–3.80                     | 83 (0.60%)                                        | 1.16 (0.77–1.73) | 227 (0.65%)                                       | 1.06 (0.84–1.34) |
| 3.81–5.15                     | 87 (0.63%)                                        | 0.95 (0.62–1.44) | 310 (0.89%)                                       | 1.20 (0.95–1.52) |
| >5.15                         | 126 (0.91%)                                       | 0.98 (0.63–1.52) | 518 (1.49%)                                       | 1.41 (1.11–1.79) |

Comparison between cases with appropriate (neostigmine  $\leq 60$   $\mu\text{g/kg}$  at a minimum of train-of-four count of 2) vs. inappropriate (no neostigmine administration or neostigmine administration not guided by train-of-four count or doses  $> 60$   $\mu\text{g/kg}$ ) reversal of neuromuscular blockade by an NMBA. Incidences are displayed as frequency (%), and estimated effects are displayed as odds ratios with 95% CIs. The following covariates were included in the model: NMBA dose, age, sex, body mass index, American Society of Anesthesiologists classification, procedure duration, Charlson Comorbidity Index variables, score for prediction of respiratory complications variables, depth of anesthesia (age-corrected minimum alveolar concentration), norepinephrine equivalent dose per hour, surgical body region, surgical procedure relative value units, admission type (in-patient/ambulatory), emergency surgery status, transfused blood units, total fluid resuscitation volume, morphine equivalent dose, number of hypotensive minutes during the case, and documentation of any train-of-four monitoring. ED95 = median dose required per body weight to achieve 95% reduction in maximal twitch response from baseline in 50% of the population; NMBA = neuromuscular-blocking agent.

Repeated administration of NMBAs leads to a prolonged duration of action, as defined by the time between administration of NMBA and recovery to a TOF ratio greater than or equal to 0.9,<sup>10–12</sup> a fact that may not always be taken into account by clinicians. This does not mean that higher individual doses of NMBAs, either by administration of a large individual dose or by repeated administration of smaller dosages, are not safe when clinically indicated, but rather that judicious use of these drugs should be advocated in the interest of patient safety.<sup>47,48</sup>

### Neuromuscular Transmission Monitoring and Residual Paralysis

In our cohort, 1,426 providers (2.9%) administered NMBAs during the last 30 min of the case, which probably translates to residual neuromuscular block at the end of the case. Residual paralysis has been reported to occur in 20 to 45% of cases in which NMBAs are used.<sup>10</sup> Objective quantitative monitoring of neuromuscular transmission is the only reliable method to exclude residual neuromuscular blockade; however, qualitative, visual, or tactile TOF monitoring is more widespread.<sup>28,49</sup> Despite the growing body of literature to support the use of neuromuscular transmission monitoring, this practice is not consistently used by anesthesia providers.<sup>49,50</sup> Two recent surveys of anesthesiologists reported that neuromuscular transmission monitoring was only used routinely by 17 to 50% of anesthesia providers.<sup>51,52</sup> In our department, 34,508 of 48,499 anesthesia providers (71.15%) used subjective assessment of the evoked TOF count in response to TOF stimulation. Our data show that the documentation of a TOF count alone does not decrease the dose-dependent risk of respiratory complications associated with NMBAs.

### Desirable Patterns of Neostigmine Reversal to Increase Respiratory Safety

*Post hoc*, we defined, based on our data and a previous report,<sup>27,28</sup> appropriate neostigmine use as neostigmine

administration at a visual or tactile evaluated TOF count of 2 or greater at doses less than 60  $\mu\text{g/kg}$ . When neostigmine was administered at a TOF count of 2 or greater and at doses 60  $\mu\text{g/kg}$  or less, NMBA dose was not a significant predictor of respiratory complications (highest vs. lowest NMBA dose: OR, 0.98; 95% CI, 0.63 to 1.52;  $P = 0.94$ ). These exploratory findings suggest that the use of TOF monitoring in tandem with neostigmine administration at doses 60  $\mu\text{g/kg}$  or less is a viable strategy to decrease the incidence of NMBA-induced respiratory complications.

In our study, high doses of the acetylcholinesterase inhibitor neostigmine ( $> 60$   $\mu\text{g/kg}$ ), intended to reverse the effects of NMBAs, increased the risk of respiratory complications independent of NMBA effects. These doses are in the upper range of recommended neostigmine dosing.<sup>53</sup> We speculate based on our data that neostigmine-induced partial neuromuscular transmission block may explain adverse respiratory outcomes in patients who received high-dose neostigmine after recovery of neuromuscular transmission. Based on our results, we believe that anesthesia providers at our institution administer higher doses of neostigmine in an attempt to reverse deeper neuromuscular blockade. We observed a positive interaction effect between total NMBA dose and total neostigmine dose (OR, 1.70; 95% CI, 1.27 to 2.26;  $P < 0.001$ ), indicating that the relation between neostigmine dose and postoperative respiratory complications becomes stronger in cases where higher total doses of NMBAs are given. Our data complement the findings of a recently published observational study, which demonstrated that high-dose neostigmine ( $> 60$   $\mu\text{g/kg}$ ) resulted in longer time to discharge from the postanesthesia care unit and longer postoperative hospital length of stay.<sup>28</sup> Neostigmine does not reverse deep neuromuscular blockade<sup>10,54–56</sup> and should not be given to patients who present with deep neuromuscular blockade<sup>55–57</sup> because it can result in incomplete reversal. Furthermore, it may lead to anesthesia providers falsely believing their patients to have safe return of muscular function.



### Benzylisoquinoline versus Aminosteroidal NMBAs

Previous data indicate reduced variability in the time to recovery with benzylisoquinoline NMBAs compared with aminosteroidal NMBAs.<sup>10</sup> Therefore, we evaluated the differential effects of benzylisoquinoline *versus* aminosteroidal NMBAs on our primary outcome measure. We did not find any significant difference between the use of either pharmacological groups and the risk of postoperative respiratory outcomes, despite lower variability in duration of action of benzylisoquinolines compared with steroids.<sup>10</sup>

### Clinical Implications

Our data support the view that all patients receiving neuromuscular-blocking drugs should have assessment of the block intensity during the intraoperative period and particularly before tracheal extubation. Clinical signs (*e.g.*, head lift, hand grip, *etc.*) have been shown to be very insensitive indicators of residual block and are not applicable in the anesthetized patient. Intraoperative neuromuscular function should be evaluated by observing the mechanical response to peripheral nerve stimulation whenever a nondepolarizing relaxant is administered. At a minimum, this requires qualitative assessment of the TOF and/or posttetanic count (*e.g.*, visual and tactile observations) in all subjects. However, subjective evaluation of the TOF fade is subject to considerable error. Thus, quantitative monitoring of the depth of neuromuscular block is the preferred method of evaluating residual block.<sup>48</sup>

Our data also support the view that neostigmine dose should be selected based on twitch monitoring results, and we have published a regimen describing on how to titrate neostigmine based on TOF monitoring results.<sup>58</sup>

### Limitations

Despite our thorough confounder control, residual confounding is possible as our data are observational. To minimize the confounding effects of surgical complexity, we performed the same analyses on the subgroup of patients undergoing laparoscopic cholecystectomy. In this homogenous subset of patients undergoing similar perioperative course and interventions, we found that our results were reproducible with NMBAs being associated with an increased risk of postoperative respiratory complications (OR, 3.42; 95% CI, 1.01 to 11.57;  $P = 0.048$ ). We also assessed whether removing subjects who had multiple surgeries within the past 5 yr would affect our results. In this sensitivity analysis, an association remained between NMBA dose and postoperative respiratory complications (highest quintile *vs.* lowest quintile: OR, 1.38; 95% CI, 1.09 to 1.76;  $P = 0.008$ ). To identify patients with endotracheal reintubation within the first 3 days after surgery, we included only patients whose tracheas were extubated in the operating room. This may have introduced a selection bias.

The use of NMBAs was dose dependently associated with increased risk of postoperative respiratory complications. Neostigmine reversal was also associated with a dose-dependent increase in the risk of respiratory complications. However, our exploratory data analysis suggests that the proper use of neostigmine guided by neuromuscular transmission monitoring results can help eliminate postoperative respiratory complications associated with the use of NMBAs.

### Acknowledgments

The authors thank Laurent G. Glance, M.D., University of Rochester Medical Center, School of Medicine and Dentistry of Rochester, Rochester, New York, for his advice on how to control for surgical complexity.

This project was supported by an unrestricted research grant from the Buzen Fund, established by Jeffrey Buzen, Ph.D., and Judith Buzen of Boston, Massachusetts.

### Competing Interests

Dr. Eikermann received funding for investigator-initiated research from Merck, Whitehouse Station, New Jersey, and from Massimo, Irvine, California. Dr. Eikermann has filed a patent application for a new drug to reverse the effects of neuromuscular-blocking agents. The other authors declare no competing interests.

### Correspondence

Address correspondence to Dr. Eikermann: Department of Anesthesia, Critical Care, and Pain Medicine, Massachusetts General Hospital, 55 Fruit Street, Boston, Massachusetts 02114. meikermann@partners.org. This article may be accessed for personal use at no charge through the Journal Web site, [www.anesthesiology.org](http://www.anesthesiology.org).

### References

- Weiser TG, Regenbogen SE, Thompson KD, Haynes AB, Lipsitz SR, Berry WR, Gawande AA: An estimation of the global volume of surgery: A modelling strategy based on available data. *Lancet* 2008; 372:139–44
- Mencke T, Echternach M, Kleinschmidt S, Lux P, Barth V, Plinkert PK, Fuchs-Buder T: Laryngeal morbidity and quality of tracheal intubation: A randomized controlled trial. *ANESTHESIOLOGY* 2003; 98:1049–56
- Kafer ER, Marsh HM: The effects of anesthetic drugs and disease on the chemical regulation of ventilation. *Int Anesthesiol Clin* 1977; 15:1–38
- Kumar GV, Nair AP, Murthy HS, Jalaja KR, Ramachandra K, Parameshwara G: Residual neuromuscular blockade affects postoperative pulmonary function. *ANESTHESIOLOGY* 2012; 117:1234–44
- Murphy GS, Brull SJ: Residual neuromuscular block: Lessons unlearned. Part I: Definitions, incidence, and adverse physiologic effects of residual neuromuscular block. *Anesth Analg* 2010; 111:120–8
- Dimick JB, Chen SL, Taheri PA, Henderson WG, Khuri SF, Campbell DA Jr: Hospital costs associated with surgical complications: A report from the private-sector National Surgical Quality Improvement Program. *J Am Coll Surg* 2004; 199:531–7
- Khuri SF, Henderson WG, DePalma RG, Mosca C, Healey NA, Kumbhani DJ: Participants in the VA National Surgical

- Quality Improvement Program: Determinants of long-term survival after major surgery and the adverse effect of postoperative complications. *Ann Surg* 2005; 242:326–41; discussion 341–3
8. Ramachandran SK, Nafiu OO, Ghaferi A, Tremper KK, Shanks A, Kheterpal S: Independent predictors and outcomes of unanticipated early postoperative tracheal intubation after nonemergent, noncardiac surgery. *ANESTHESIOLOGY* 2011; 115:44–53
  9. Smetana GW, Lawrence VA, Cornell JE; American College of Physicians: Preoperative pulmonary risk stratification for noncardiothoracic surgery: Systematic review for the American College of Physicians. *Ann Intern Med* 2006; 144:581–95
  10. Maybauer DM, Geldner G, Blobner M, Pühringer F, Hofmockel R, Rex C, Wulf HF, Eberhart L, Arndt C, Eikermann M: Incidence and duration of residual paralysis at the end of surgery after multiple administrations of cisatracurium and rocuronium. *Anaesthesia* 2007; 62:12–7
  11. Cammu G, de Kam PJ, De Graeve K, van den Heuvel M, Suy K, Morias K, Foubert L, Grobara P, Peeters P: Repeat dosing of rocuronium 1.2 mg/kg after reversal of neuromuscular block by sugammadex 4.0 mg/kg in anesthetized healthy volunteers: A modelling-based pilot study. *Br J Anaesth* 2010; 105:487–92
  12. Slavov V, Khalil M, Merle JC, Agostini MM, Ruggier R, Duvaldestin P: Comparison of duration of neuromuscular blocking effect of atracurium and vecuronium in young and elderly patients. *Br J Anaesth* 1995; 74:709–11
  13. Brueckmann B, Villa-Urbe JL, Bateman BT, Grosse-Sundrup M, Hess DR, Schlett CL, Eikermann M: Development and validation of a score for prediction of postoperative respiratory complications. *ANESTHESIOLOGY* 2013; 118:1276–85
  14. Grosse-Sundrup M, Henneman JP, Sandberg WS, Bateman BT, Uribe JV, Nguyen NT, Ehrenfeld JM, Martinez EA, Kurth T, Eikermann M: Intermediate acting non-depolarizing neuromuscular blocking agents and risk of postoperative respiratory complications: Prospective propensity score matched cohort study. *BMJ* 2012; 345:e6329
  15. Belmont MR, Lien CA, Quessy S, Abou-Donia MM, Abalos A, Eppich L, Savarese JJ: The clinical neuromuscular pharmacology of 51W89 in patients receiving nitrous oxide/opioid/barbiturate anesthesia. *ANESTHESIOLOGY* 1995; 82:1139–45
  16. Naguib M, Samarkandi AH, Bakhamees HS, Magboul MA, el-Bakry AK: Comparative potency of steroidal neuromuscular blocking drugs and isobolographic analysis of the interaction between rocuronium and other aminosteroids. *Br J Anaesth* 1995; 75:37–42
  17. Shanks CA: Pharmacokinetics of the nondepolarizing neuromuscular relaxants applied to calculation of bolus and infusion dosage regimens. *ANESTHESIOLOGY* 1986; 64:72–86
  18. Pai MP, Paloucek FP: The origin of the “ideal” body weight equations. *Ann Pharmacother* 2000; 34:1066–9
  19. van Kralingen S, van de Garde EM, Knibbe CA, Diepstraten J, Wiezer MJ, van Ramshorst B, van Dongen EP: Comparative evaluation of atracurium dosed on ideal body weight *vs.* total body weight in morbidly obese patients. *Br J Clin Pharmacol* 2011; 71:34–40
  20. Quan H, Sundararajan V, Halfon P, Fong A, Burnand B, Luthi JC, Saunders LD, Beck CA, Feasby TE, Ghali WA: Coding algorithms for defining comorbidities in ICD-9-CM and ICD-10 administrative data. *Med Care* 2005; 43:1130–9
  21. Saravanan S, Kocarev M, Wilson RC, Watkins E, Columb MO, Lyons G: Equivalent dose of ephedrine and phenylephrine in the prevention of post-spinal hypotension in Caesarean section. *Br J Anaesth* 2006; 96:95–9
  22. Haffey F, Brady RR, Maxwell S: A comparison of the reliability of smartphone apps for opioid conversion. *Drug Saf* 2013; 36:111–7
  23. Lerou JG: Nomogram to estimate age-related MAC. *Br J Anaesth* 2004; 93:288–91
  24. Glance LG, Kellermann AL, Osler TM, Li Y, Mukamel DB, Lustik SJ, Eaton MP, Dick AW: Hospital readmission after noncardiac surgery: The role of major complications. *JAMA Surg* 2014; 149:439–46
  25. Merkow RP, Bentrem DJ, Cohen ME, Paruch JL, Weber SM, Ko CY, Bilimoria KY: Effect of cancer surgery complexity on short-term outcomes, risk predictions, and hospital comparisons. *J Am Coll Surg* 2013; 217:685–93
  26. Murphy MM, Ng SC, Simons JP, Csikesz NG, Shah SA, Tseng JF: Predictors of major complications after laparoscopic cholecystectomy: Surgeon, hospital, or patient? *J Am Coll Surg* 2010; 211:73–80
  27. Sasaki N, Meyer MJ, Malviya SA, Stanislaus AB, MacDonald T, Doran ME, Igumensheva A, Hoang AH, Eikermann M: Effects of neostigmine reversal of nondepolarizing neuromuscular blocking agents on postoperative respiratory outcomes: A prospective study. *ANESTHESIOLOGY* 2014; 121:959–68
  28. Illman HL, Laurila P, Anttila H, Meretoja OA, Alahuhta S, Olkkola KT: The duration of residual neuromuscular block after administration of neostigmine or sugammadex at two visible twitches during train-of-four monitoring. *Anesth Analg* 2011; 112:63–8
  29. Pedersen T, Viby-Mogensen J, Ringsted C: Anaesthetic practice and postoperative pulmonary complications. *Acta Anaesthesiol Scand* 1992; 36:812–8
  30. Arbous MS, Meursing AE, van Kleef JW, de Lange JJ, Spoormans HH, Touw P, Werner FM, Grobbee DE: Impact of anesthesia management characteristics on severe morbidity and mortality. *ANESTHESIOLOGY* 2005; 102:257–68; quiz 491–2
  31. Harrison GG: Death attributable to anesthesia. A 10-year survey (1967–1976). *Br J Anaesth* 1978; 50:1041–6
  32. Rose DK, Cohen MM, Wigglesworth DF, DeBoer DP: Critical respiratory events in the postanesthesia care unit. Patient, surgical, and anesthetic factors. *ANESTHESIOLOGY* 1994; 81:410–8
  33. Sprung J, Warner ME, Contreras MG, Schroeder DR, Beighley CM, Wilson GA, Warner DO: Predictors of survival following cardiac arrest in patients undergoing noncardiac surgery: A study of 518,294 patients at a tertiary referral center. *ANESTHESIOLOGY* 2003; 99:259–69
  34. Hayes AH, Mirakhur RK, Breslin DS, Reid JE, McCourt KC: Postoperative residual block after intermediate-acting neuromuscular blocking drugs. *Anaesthesia* 2001; 56:312–8
  35. Murphy GS, Szokol JW, Marymont JH, Franklin M, Avram MJ, Vender JS: Residual paralysis at the time of tracheal extubation. *Anesth Analg* 2005; 100:1840–5
  36. Plaud B, Debaene B, Donati F, Marty J: Residual paralysis after emergence from anesthesia. *ANESTHESIOLOGY* 2010; 112:1013–22
  37. Sasaki N, Meyer MJ, Eikermann M: Postoperative respiratory muscle dysfunction: Pathophysiology and preventive strategies. *ANESTHESIOLOGY* 2013; 118:961–78
  38. Futier E, Constantin JM, Paugam-Burtz C, Pascal J, Eurin M, Neuschwander A, Marret E, Beaussier M, Gutton C, Lefrant JY, Allaouchiche B, Verzilli D, Leone M, De Jong A, Bazin JE, Pereira B, Jaber S; IMPROVE Study Group: A trial of intraoperative low-tidal-volume ventilation in abdominal surgery. *N Engl J Med* 2013; 369:428–37
  39. Rinder C: Cellular inflammatory response and clinical outcome in cardiac surgery. *Curr Opin Anaesthesiol* 2006; 19:65–8
  40. Assaad S, Popescu W, Perrino A: Fluid management in thoracic surgery. *Curr Opin Anaesthesiol* 2013; 26:31–9
  41. Butterly A, Bittner EA, George E, Sandberg WS, Eikermann M, Schmidt U: Postoperative residual curarization from intermediate-acting neuromuscular blocking agents delays recovery room discharge. *Br J Anaesth* 2010; 105:304–9

42. Eikermann M, Groeben H, Bünthen B, Peters J: Fade of pulmonary function during residual neuromuscular blockade. *Chest* 2005; 127:1703–9
43. Eikermann M, Vogt FM, Herbstreit F, Vahid-Dastgerdi M, Zenge MO, Ochterbeck C, de Greiff A, Peters J: The predisposition to inspiratory upper airway collapse during partial neuromuscular blockade. *Am J Respir Crit Care Med* 2007; 175:9–15
44. Murphy GS: Residual neuromuscular blockade: Incidence, assessment, and relevance in the postoperative period. *Minerva Anesthesiol* 2006; 72:97–109
45. Murphy GS, Szokol JW, Marymont JH, Greenberg SB, Avram MJ, Vender JS: Residual neuromuscular blockade and critical respiratory events in the postanesthesia care unit. *Anesth Analg* 2008; 107:130–7
46. Sundman E, Witt H, Olsson R, Ekberg O, Kuylensstierna R, Eriksson LI: The incidence and mechanisms of pharyngeal and upper esophageal dysfunction in partially paralyzed humans: Pharyngeal videoradiography and simultaneous manometry after atracurium. *ANESTHESIOLOGY* 2000; 92:977–84
47. King M, Sujirattanawimol N, Danielson DR, Hall BA, Schroeder DR, Warner DO: Requirements for muscle relaxants during radical retropubic prostatectomy. *ANESTHESIOLOGY* 2000; 93:1392–7
48. Brull SJ, Murphy GS: Residual neuromuscular block: Lessons unlearned. Part II: Methods to reduce the risk of residual weakness. *Anesth Analg* 2010; 111:129–40
49. Eriksson LI: Evidence-based practice and neuromuscular monitoring: It's time for routine quantitative assessment. *ANESTHESIOLOGY* 2003; 98:1037–9
50. El-Orbany M, Ali HH, Baraka A, Salem MR: Residual neuromuscular block should, and can, be a “never event.” *Anesth Analg* 2014; 118:691
51. Fuchs-Buder T, Sirieix D, Schmartz D, Plaud B: [Monitoring of neuromuscular block by acceleromyography: Concepts, applications and limits of use]. *Ann Fr Anesth Reanim* 2012; 31:922–5
52. Phillips S, Stewart PA, Bilgin AB: A survey of the management of neuromuscular blockade monitoring in Australia and New Zealand. *Anaesth Intensive Care* 2013; 41:374–9
53. Bevan DR, Donati F, Kopman AF: Reversal of neuromuscular blockade. *ANESTHESIOLOGY* 1992; 77:785–805
54. Geldner G, Niskanen M, Laurila P, Mizikov V, Hübner M, Beck G, Rietbergen H, Nicolayenko E: A randomised controlled trial comparing sugammadex and neostigmine at different depths of neuromuscular blockade in patients undergoing laparoscopic surgery. *Anaesthesia* 2012; 67:991–8
55. Meyer MJ, Bateman BT, Kurth T, Eikermann M: Neostigmine reversal doesn't improve postoperative respiratory safety. *BMJ* 2013; 346:f1460
56. Sato T, Nakatsuka H: [Anticholinesterases; peripheral and central effects]. *Masui* 2013; 62:19–26
57. Alfille PH, Merritt C, Chamberlin NL, Eikermann M: Control of perioperative muscle strength during ambulatory surgery. *Curr Opin Anaesthesiol* 2009; 22:730–7
58. Kopman AF, Eikermann M: Antagonism of non-depolarising neuromuscular block: Current practice. *Anaesthesia* 2009; 64(suppl 1):22–30

## Appendix 1.

## ICD-9 and CPT Codes Used to Define Pulmonary Outcomes

| Pulmonary Outcome     | Description                                                                                                                                                              | ICD-9/CPT (American Medical Association, USA) | Code   |
|-----------------------|--------------------------------------------------------------------------------------------------------------------------------------------------------------------------|-----------------------------------------------|--------|
| Respiratory failure   | Pulmonary insufficiency after trauma and surgery                                                                                                                         | ICD-9                                         | 518.5  |
|                       | Acute respiratory failure after trauma and surgery                                                                                                                       | ICD-9                                         | 518.51 |
|                       | Other pulmonary insufficiency, not elsewhere classified, after trauma and surgery                                                                                        | ICD-9                                         | 518.52 |
|                       | Respiratory failure                                                                                                                                                      | ICD-9                                         | 518.81 |
|                       | Other pulmonary insufficiency, not elsewhere classified                                                                                                                  | ICD-9                                         | 518.82 |
|                       | Acute and chronic respiratory failure                                                                                                                                    | ICD-9                                         | 518.84 |
| Pulmonary edema       | Pulmonary congestion and hypostasis                                                                                                                                      | ICD-9                                         | 514    |
|                       | Acute edema of lung, unspecified                                                                                                                                         | ICD-9                                         | 518.4  |
|                       | Congestive heart failure                                                                                                                                                 | ICD-9                                         | 428.0  |
|                       | Fluid overload                                                                                                                                                           | ICD-9                                         | 276.6  |
|                       | Other fluid overload                                                                                                                                                     | ICD-9                                         | 276.69 |
| Tracheal reintubation | Intubation, endotracheal, emergency procedure                                                                                                                            | CPT (AMA, Chicago, IL)                        | 31500  |
|                       | Ventilation assist and management, initiation of pressure or volume preset ventilators for assisted or controlled breathing; hospital inpatient/observation, initial day | CPT (AMA, Chicago, IL)                        | 94002  |
| Pneumonia             | Pneumococcal pneumonia ( <i>Streptococcus pneumoniae</i> pneumonia)                                                                                                      | ICD-9                                         | 481    |
|                       | Pneumonia due to <i>Klebsiella pneumonia</i>                                                                                                                             | ICD-9                                         | 482.0  |
|                       | Pneumonia due to <i>Pseudomonas</i>                                                                                                                                      | ICD-9                                         | 482.1  |
|                       | Pneumonia due to <i>Streptococcus</i> , unspecified                                                                                                                      | ICD-9                                         | 482.30 |
|                       | Pneumonia due to <i>Staphylococcus</i> , unspecified                                                                                                                     | ICD-9                                         | 482.40 |
|                       | Pneumonia due to <i>Staphylococcus aureus</i>                                                                                                                            | ICD-9                                         | 482.41 |
|                       | Methicillin-resistant pneumonia due to <i>Staphylococcus aureus</i>                                                                                                      | ICD-9                                         | 482.42 |
|                       | Pneumonia due to <i>Escherichia coli</i>                                                                                                                                 | ICD-9                                         | 482.82 |
|                       | Pneumonia due to other Gram-negative bacteria                                                                                                                            | ICD-9                                         | 482.83 |
|                       | Pneumonia due to other specified bacteria                                                                                                                                | ICD-9                                         | 482.89 |
|                       | Bacterial pneumonia, unspecified                                                                                                                                         | ICD-9                                         | 482.9  |
|                       | Pneumonia, organism unspecified                                                                                                                                          | ICD-9                                         | 486    |
|                       | Pneumonia due to other specified organism                                                                                                                                | ICD-9                                         | 483.8  |
|                       | Pneumonia in aspergillosis                                                                                                                                               | ICD-9                                         | 484.6  |
|                       | Bronchopneumonia, organism unspecified                                                                                                                                   | ICD-9                                         | 485    |
|                       | Pneumonitis due to inhalation of food or vomitus                                                                                                                         | ICD-9                                         | 507.0  |

AMA = American Medical Association; CPT = Current Procedural Terminology; ICD-9 = *International Classification of Diseases, Ninth Revision*.



## Appendix 2.

### Control Variables Included in Regression Analyses

| Variables                                            | Primary Analysis | Secondary Analysis | Laparoscopic Cholecystectomies | Multiple Surgeries Excluded | Appropriate Neostigmine Analysis |
|------------------------------------------------------|------------------|--------------------|--------------------------------|-----------------------------|----------------------------------|
| NMBA dose as multiples of ED95                       | X                |                    |                                |                             |                                  |
| NMBA dose as multiples of ED95 (quintiles)           |                  | X                  | X                              | X                           | X                                |
| Neostigmine dose (mg/kg ideal body weight)           | X                | X                  | X                              | X                           | X                                |
| Age                                                  | X                | X                  | X                              | X                           | X                                |
| Sex                                                  | X                | X                  | X                              | X                           | X                                |
| Body mass index                                      | X                | X                  | X                              | X                           | X                                |
| ASA classification                                   | X                | X                  | X                              | X                           | X                                |
| Procedure duration                                   | X                | X                  |                                | X                           | X                                |
| Charlson Comorbidity Index                           | X                | X                  |                                | X                           | X                                |
| SPORC score                                          | X                | X                  |                                | X                           | X                                |
| Depth of anesthesia (age-corrected MAC in quintiles) | X                | X                  |                                | X                           | X                                |
| Norepinephrine equivalent dose per hour (quintiles)  | X                | X                  |                                | X                           | X                                |
| Surgical body region                                 | X                | X                  |                                | X                           | X                                |
| Surgical procedure relative value units              | X                | X                  |                                | X                           | X                                |
| Admission type (in-patient/ambulatory)               | X                | X                  |                                | X                           | X                                |
| Emergency surgery status                             | X                | X                  |                                | X                           | X                                |
| Units of blood transfused                            | X                | X                  |                                | X                           | X                                |
| Total fluid resuscitation volume (quintiles)         | X                | X                  |                                | X                           | X                                |
| Morphine equivalent dose (quintiles)                 | X                | X                  | X                              | X                           | X                                |
| Number of hypotensive minutes                        | X                | X                  |                                | X                           | X                                |
| Use of train-of-four monitoring                      | X                | X                  |                                | X                           | X                                |

ASA = American Society of Anesthesiologist; ED95 = median dose required per body weight to achieve 95% reduction in maximal twitch response from baseline in 50% of the population; MAC = minimum alveolar concentration; NMBA = neuromuscular-blocking agent; SPORC = score for preoperative prediction of adverse postoperative respiratory outcomes.
